## A Clinical and Pharmacokinetic Study

Frédérique S. Servin, M.D.,\* Elisabeth Lavaut, M.D.,\* Ursula Kleef, B.Sc.,† Jean Marie Desmonts, M.D.‡

**Methods:** Rocuronium was administered to 26 cirrhotic patients and 24 control subjects anesthetized with isoflurane for an elective procedure. Patients were randomly allocated to receive an initial dose of rocuronium: 120, 180, 250, or 300  $\mu\text{g} \cdot \text{kg}^{-1}$ . Dose-response curves were established, and  $\text{ED}_{50}$  was calculated. Preselected maintenance doses (75, 150, or 225  $\mu\text{g} \cdot \text{kg}^{-1}$ ) were administered at 25% recovery of twitch height to compare clinical duration of action. At the end of the procedure, relaxation was reversed in half of the patients, and the time course of recovery was compared in the two groups. Blood samples drawn during the procedure and after the last maintenance dose allowed pharmacokinetic analysis in six cirrhotic patients and six control subjects.

**Results:** ED<sub>50</sub> of the initial dose was 144  $\mu\text{g} \cdot \text{kg}^{-1}$  in cirrhotic patients and 60  $\mu\text{g} \cdot \text{kg}^{-1}$  in control subjects, related to a higher initial volume of distribution (cirrhotic  $78.5 \pm 31.7 \text{ ml} \cdot \text{kg}^{-1}$ , control  $29.8 \pm 17.3 \text{ ml} \cdot \text{kg}^{-1}$ ). Time from complementary dose to 25% recovery was longer in cirrhotic patients ( $41.0 \pm 20.7 \text{ min}$  vs.  $30.2 \pm 9.7 \text{ min}$ ), but time course of action during maintenance was not statistically different in the two groups. In cirrhotic patients receiving five maintenance doses or more, prolongation of the duration of action with successive

\* Staff Anesthesiologist, Hôpital Bichat, Paris, France.

† Research Group for Experimental Anesthesiology and Clinical Pharmacology, University of Groningen, Groningen, The Netherlands.

‡ Professor and Chair, Département d'Anesthésie et de Réanimation Chirurgicale, Hôpital Bichat, Paris, France.

Received from the Département d'Anesthésie et de Réanimation Chirurgicale, Hôpital Bichat, Paris, France. Submitted for publication April 21, 1994. Accepted for publication January 22, 1996. Supported by a grant from Organon-Teknika, Turnhout, Belgium.

Address reprint requests to Dr. Servin: Département d'Anesthésie et de Réanimation Chirurgicale, CHU Hôpital Bichat, 46, rue Henri-Huchard, Paris Cedex 18, France.

**Conclusions:** Rocuronium pharmacodynamics are moderately altered by cirrhosis, possibly because of pharmacokinetic alterations. Individual variability in response to rocuronium is great, and dosage should be carefully titrated to that required. (Key words: Liver cirrhosis. Neuromuscular relaxants: rocuronium. Pharmacodynamics. Pharmacokinetics.)

**ROCURONIUM** is a short-acting, nondepolarizing muscle relaxant with an intermediate duration of action and a steroid structure derived from that of pancuronium and vecuronium.

Its elimination pathways remain uncertain in humans because only one-third of the dose is recovered in urine,<sup>1</sup> with thus far no evidence of metabolism. Animal studies have shown biliary excretion, specifically in cats,<sup>2</sup> but the importance of this pathway in humans remains unknown. Human hepatocytes in culture seem to take up rocuronium swiftly,<sup>3</sup> and thus some hepatic elimination of the compound in humans might be expected.

Muscle relaxants often display pharmacodynamic and pharmacokinetic changes in cirrhotic patients because alterations in elimination processes.<sup>4,5</sup> We therefore compared pharmacodynamic effects and pharmacokinetic parameters after repeated doses of rocuronium in cirrhotic and healthy patients.

Written informed consent to participate to this prospective, randomized, institutionally approved study was obtained from 50 ASA physical status 1 or 2 patients (26 cirrhotic patients and 24 normal patients), aged

18-65 yr, scheduled laryngologic, with For all cirrhotic been established biologic history episode of clinical tion. Patients with medication known function were not adrenergic block Body weight loss basis of height additional exclusion ence of encephal hyperthermia, disease, or impaired group) liver function

Patients received approximately 1 l h before entering the operating room. Blood pressure, electrocardiogram, bin oxygen saturation and end-tidal carbon dioxide were monitored continuously and measured every 5 minutes for 3 minutes. Anesthesia was induced with thiopental and maintained with concentrations of isoflurane. Ventilation was performed with a volume-controlled, pressure-limited, time-triggered, volume-cycled, and PEEP blocking agent. The mixture of isoflurane and nitrous oxide was maintained at 1 MAC for the concentrations of isoflurane. Patients' lungs were ventilated with a mixture of 60% oxygen and 40% nitrous oxide. The state of consciousness was maintained by propofol. The patients were ventilated with 1 MAC for the concentrations of isoflurane. To ensure a steady state of equilibrium, the blood pressure were maintained before warming.

The ulnar nerve electrodes with stimulation at a rate of four (TOF)) responses of the recorded by a f

## CLINICAL AND PHARMACOKINETIC STUDY OF ROCURONIUM IN CIRRHOSIS

18–65 yr, scheduled for elective surgery, mostly otolaryngologic, with an anticipated duration of 1–3 h. For all cirrhotic patients, the diagnosis of cirrhosis had been established by liver biopsy or by a clinical and biologic history of cirrhosis, with at least one previous episode of clinically significant hepatic decompensation. Patients who during the last 7 days had received medications known to interfere with neuromuscular function were not studied, but corticosteroids and  $\beta$ -adrenergic blockers were allowed in cirrhotic patients. Body weight limits were imposed, calculated on the basis of  $[\text{height (cm)} - 100] \text{ kg} + 25\%$  or  $-15\%$ . Additional exclusion criteria included pregnancy, presence of encephalopathy or ascites, history of malignant hyperthermia, neuromuscular disorders, metabolic disease, or impaired kidney or (in the noncirrhotic group) liver function.

Patients received 10 mg diazepam orally, approximately 1 h before induction of anesthesia. On arrival in the operating room, baseline values of heart rate and blood pressure were recorded. In all patients, the electrocardiogram, heart rate, end-tidal  $p_{\text{CO}_2}$  and hemoglobin oxygen saturation (pulse oximetry), and inspiratory and end-tidal concentrations of isoflurane were monitored continuously. Arterial blood pressure was measured every 5 min, and always just before and every minute for 3 min after administration of rocuronium. Anesthesia was induced with  $4 \text{ mg} \cdot \text{kg}^{-1}$  intravenous thiopental and by the inhalation of increasing concentrations of isoflurane in oxygen. Tracheal intubation was performed without the use of neuromuscular blocking agents. Anesthesia was maintained with isoflurane and incremental doses of fentanyl as needed. Patients' lungs were ventilated to normocapnia with a mixture of 60%  $\text{N}_2\text{O}$  and 40%  $\text{O}_2$ . To obtain a steady-state concentration of isoflurane, the patients' lungs were ventilated with 3 MAC isoflurane for 3 min and 1 MAC for the succeeding 7 min. End-tidal isoflurane concentrations were measured throughout the study to ensure a steady-state of 0.9–1.1%. After this period of equilibration, control values of heart rate and blood pressure were recorded. Esophageal temperature was maintained between  $35^\circ\text{C}$  and  $36.5^\circ\text{C}$  by surface warming.

The ulnar nerve was stimulated at the wrist *via* surface electrodes with supramaximal pulses of 0.2 ms duration at a rate of 0.1 (twitch response) or 2.0 Hz (train-of-four (TOF)), when appropriate, and the evoked responses of the adductor pollicis were transduced and recorded by a force transducer (Bioindustry, Boulogne,

France). Monitoring of the neuromuscular response was continued until full recovery of the twitch height and a percentage TOF above 70% had been accomplished. The supramaximal stimulation current was determined after equilibration of isoflurane concentration and stabilization of twitch height. Next, one of four selected initial doses of rocuronium (120, 180, 250, or  $300 \mu\text{g} \cdot \text{kg}^{-1}$ ) was administered in a randomized fashion. With each selected initial dose, six cirrhotic patients and six control subjects were studied. Once the maximum effect of the initial dose was reached, *i.e.*, when no further decrease in evoked twitch height occurred during three consecutive stimuli, a second dose of rocuronium (330, 270, 200, or  $150 \mu\text{g} \cdot \text{kg}^{-1}$ ) was administered to reach a total dose of  $450 \mu\text{g} \cdot \text{kg}^{-1}$  in all patients. Onset time, maximal blockade before and after the second dose and time from complementary dose to 25% recovery of the twitch height were recorded, allowing construction of the dose-response curve by means of a  $\log(\text{dose})/\text{probit}$  linear regression analysis. At 25% recovery of the twitch height, one of three selected maintenance doses of rocuronium (75, 150, or  $225 \mu\text{g} \cdot \text{kg}^{-1}$ ) was randomly administered. With each selected maintenance dose, eight cirrhotic patients and eight control subjects were studied. Each time 25% recovery of the twitch height was obtained, an identical maintenance dose of the same amount was given until the end of the procedure. After each maintenance dose, maximal blockade and clinical duration were recorded. At the end of the procedure after a new randomization, in half of the patients (12 cirrhotic patients and 12 control subjects), the neuromuscular block was allowed to recover spontaneously, and the times of recovery of 25%, 75%, and 90% of the twitch height ( $T_1/T_0$ ) were determined, as well as the TOF percentage ( $T_4/T_1$ ) at those times. The remaining patients were given  $30 \mu\text{g} \cdot \text{kg}^{-1}$  intravenous neostigmine when the residual block reached 25% of the initial twitch height. Atropine ( $10 \mu\text{g} \cdot \text{kg}^{-1}$ ) was administered simultaneously. Five minutes after neostigmine administration,  $T_1/T_0$  and  $T_4/T_1$  were determined. Times to  $T_1/T_0$  of 90% and  $T_4/T_1$  of 70% were recorded. The recovery index, defined as the time between 25% and 75% recovery of the twitch height, was calculated in patients who were allowed to recover spontaneously.

The last six cirrhotic patients and the last six control subjects were included in the pharmacokinetic study. Blood samples were withdrawn on lithium-heparinized tubes before any rocuronium administration every time 25% recovery of the twitch height was obtained and 2,





## CLINICAL AND PHARMACOKINETIC STUDY OF ROCURONIUM IN CIRRHOSIS

**Table 2. Onset Time and Magnitude of Block after Different Initial Doses in Cirrhotic and Control Patients**

| Initial Dose ( $\mu\text{g/kg}$ ) | Onset Time (min)      | Magnitude of Block (%)   |
|-----------------------------------|-----------------------|--------------------------|
| 120                               |                       |                          |
| Cirrhotics (n = 7)                | $3.0 \pm 0.6$ (n = 5) | $25 \pm 22$ (n = 7)* [0] |
| Controls                          | $2.3 \pm 0.6$         | $73 \pm 23$ [1]          |
| 180                               |                       |                          |
| Cirrhotics (n = 7)                | $3.2 \pm 1.1$ (n = 7) | $77 \pm 26$ (n = 7) [3]  |
| Controls                          | $1.7 \pm 0.8$         | $96 \pm 9$ [5]           |
| 250                               |                       |                          |
| Cirrhotics                        | $1.5 \pm 0.7$         | $99 \pm 2$ [4]           |
| Controls                          | $1.6 \pm 1.1$         | $99 \pm 2$ [4]           |
| 300                               |                       |                          |
| Cirrhotics                        | $1.7 \pm 0.6$         | $99 \pm 2$ [5]           |
| Controls                          | $1.5 \pm 0.8$         | $98 \pm 5$ [5]           |

n = 6 unless otherwise stated. Values in brackets represent the number of patients with 100% maximum block. Two patients in the cirrhotic group did not display any reduction in twitch height after administration of an initial dose of  $120 \mu\text{g} \cdot \text{kg}^{-1}$ .

\*  $P < 0.05$ , cirrhotics versus controls.

by the fact that the neuromuscular block was already greater than 50% in most patients with the lowest administered dose.

The mean interval between the first dose and the complementary dose was  $3.8 \pm 1.8$  min in cirrhotic patients and  $2.8 \pm 1.8$  min in control subjects. Time from complementary dose to 25% recovery was  $41.0 \pm 20.7$  min (range 10–86 min) in cirrhotic patients and  $30.2 \pm 9.7$  min (16–51 min) in control subjects ( $P < 0.05$ ). Time from complementary dose to 25% recovery was more than 50 min in seven patients with

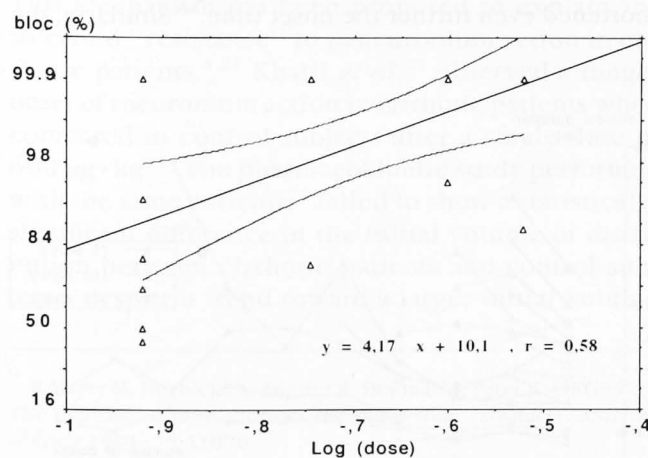**Fig. 1. Dose-response curve obtained by log(dose)/probit linear regression in control subjects; 95% confidence intervals are displayed.**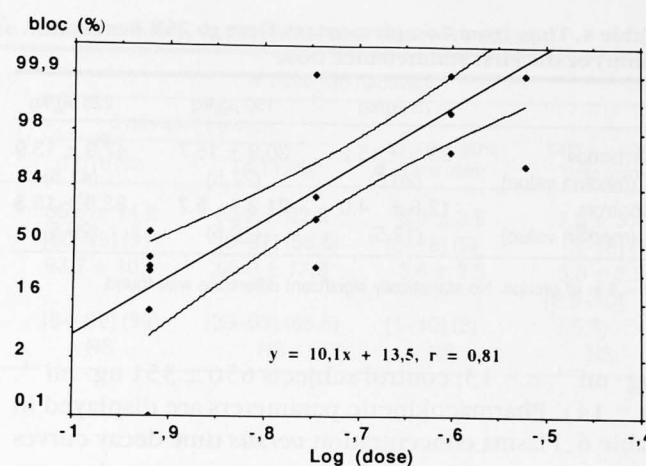**Fig. 2. Dose-response curve obtained by log(dose)/probit linear regression in cirrhotic patients; 95% confidence intervals are displayed.**

cirrhosis. Three of those had intraabdominal surgery, and three were Pugh class B patients.

Clinical duration of the first maintenance dose is displayed in table 4. The effect of repeated maintenance doses on the clinical duration of those doses is illustrated in figures 3 (control subjects) and 4 (cirrhotic patients). Despite the small number of patients who received five maintenance doses or more, prolongation of the duration of action with successive maintenance doses could be statistically demonstrated in cirrhotic patients.

The recovery parameters are displayed in table 5. In the group of patients who did not receive any reversal agent, recovery index was delayed in cirrhotic patients, who displayed a greater interindividual variability of the response. Neostigmine administration greatly speeded recovery in both groups of patients, and the difference between the two groups was not statistically significant.

Rocuronium concentrations measured at 25% recovery of the twitch height were around  $700 \text{ ng} \cdot \text{ml}^{-1}$  in both groups of patients (cirrhotic patients  $711 \pm 270$

**Table 3.  $\text{ED}_{50}$ ,  $\text{ED}_{90}$ , and  $\text{ED}_{95}$  Derived from the Log (dose)-Probit Regression Curves in Cirrhotic and Control Patients**

|                     | $\text{ED}_{50}$ ( $\mu\text{g/kg}$ ) | $\text{ED}_{90}$ ( $\mu\text{g/kg}$ ) | $\text{ED}_{95}$ ( $\mu\text{g/kg}$ ) |
|---------------------|---------------------------------------|---------------------------------------|---------------------------------------|
| Cirrhotics          | 114                                   | 193                                   | 224                                   |
| (confidence limits) | (116–164)                             | (172–219)                             | (188–241)                             |
| Controls            | 60                                    | 121                                   | 148                                   |
| (confidence limits) | (6–99)                                | (43–166)                              | (76–194)                              |



**Table 4. Time from Complementary Dose to 25% Recovery (min) of the First Maintenance Dose**

|                              | 75 $\mu\text{g/kg}$       | 150 $\mu\text{g/kg}$      | 225 $\mu\text{g/kg}$      |
|------------------------------|---------------------------|---------------------------|---------------------------|
| Cirrhotics<br>(median value) | 23.1 $\pm$ 15.2<br>(20.5) | 30.9 $\pm$ 15.7<br>(27.5) | 47.9 $\pm$ 13.9<br>(41.5) |
| Controls<br>(median value)   | 12.8 $\pm$ 4.0<br>(12.5)  | 21.3 $\pm$ 5.7<br>(19.5)  | 33.5 $\pm$ 15.3<br>(29.5) |

N = 8 in all groups. No statistically significant difference was found.

$\text{ng} \cdot \text{ml}^{-1}$ ,  $n = 13$ ; control subjects  $656 \pm 351 \text{ ng} \cdot \text{ml}^{-1}$ ,  $n = 14$ ). Pharmacokinetic parameters are displayed in table 6. Plasma concentration *versus* time decay curves after administration of the last maintenance dose are displayed in figures 5 and 6. Rocuronium pharmacokinetics were described by a two-exponential model in all patients. Initial volume of distribution and volume of distribution at steady-state were statistically larger in cirrhotic patients. Clearance was not statistically different in cirrhotic patients and control subjects. Elimination time parameters, mean resident time and  $k_{10}$ , were delayed in cirrhotic patients. One cirrhotic patient ( $n^{\circ} 21$ ) had a volume of distribution at steady-state well above all the other patients. He had suffered previously from an ascites and decompensation of his cirrhosis, although he had no more clinically detectable ascites at the time of surgery (umbilical hernia repair).

No significant changes in heart rate and blood pressure were recorded after maintenance doses under stable anesthetic conditions. No local or general side effects were observed.

## Discussion

This study demonstrates some alterations in the pharmacodynamic and pharmacokinetic profile of repeated doses of rocuronium in cirrhotic patients when compared with that observed in healthy patients. The most striking features are a reduction of the clinical efficiency of the initial dose; a trend toward prolongation of action during maintenance, best demonstrated by a delayed spontaneous recovery; and a large interindividual variability. Those alterations are due to pharmacokinetic changes in cirrhotic patients.

The data obtained from control subjects are in good agreement with those already published in the literature. The onset time of rocuronium action was slightly shorter than what usually is considered for those rather low doses. This might be because of the potentiation

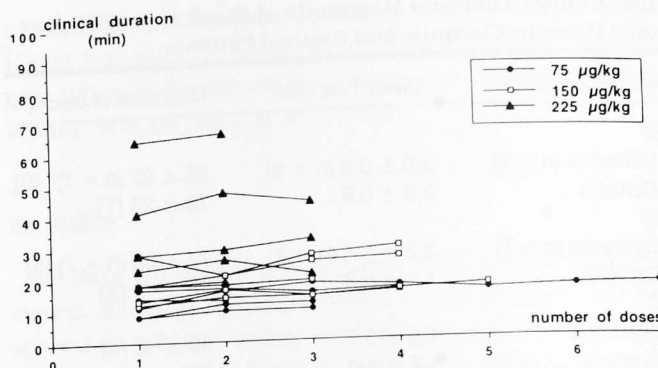

**Fig. 3. Time from complementary dose to 25% recovery of repeated doses of rocuronium in control subjects.**

by isoflurane: In our study, when considering induction time before intubation, equilibration time and time awaited for the twitch height to stabilize, the patients received rocuronium after about 20 min of isoflurane administration. The diffusion of halothane into the muscle compartment requires about 30 min to reach the equilibrium of the concentrations between alveoli, blood, and muscles.<sup>11</sup> The equilibrium between alveoli and blood is more rapid with isoflurane, because of its lower solubility.<sup>12</sup> Thus, the influence of isoflurane, specifically on the initial doses, was probably more important in this study than in reports of rocuronium used earlier in the course of anesthesia.<sup>13</sup> Before desflurane appearance in clinical use,<sup>14</sup> isoflurane appeared to be the volatile agent that potentiated most pharmacodynamic effects of muscle relaxants.<sup>15</sup> The fact that the patients were stimulated until stabilization of the twitch height before rocuronium injection probably shortened even further the onset time.<sup>16</sup> Similarly, the

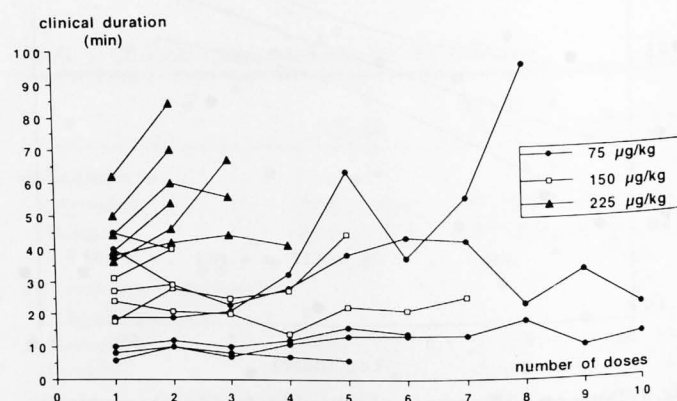

**Fig. 4. Time from complementary dose to 25% recovery of repeated doses of rocuronium in cirrhotic patients.**

**Table 5. Recovery P**

|            |                  |
|------------|------------------|
| Cirrhotics | [range] (median) |
| Controls   | [range] (median) |
| P          |                  |

NS = not significant.

onset time was sh  
the dose. §

The ED<sub>50</sub> obtain  
healthy patients  
calculated for this a  
values very close  
ceiving rocuroni  
potentiation of r  
explain our low  
variability observ  
confirms the res  
et al. ||

The statistical  
sponse curve in  
important redu  
the lower initial  
fold increase in  
related to the l  
This mechanism  
so-called 'resis  
rhotic patients.  
onset of rocuron  
compared to co  
600  $\mu\text{g} \cdot \text{kg}^{-1}$ . T  
with the same p  
significant diffe  
bution between  
jects, despite a

§ Mayer M, Doeni  
The increase of dos  
SIOLOGY 1991; 75:A

|| Mellinghoff H,  
cardiovascular prop  
1991; 75:A807.

Anesthesiology, V 8

## CLINICAL AND PHARMACOKINETIC STUDY OF ROCURONIUM IN CIRRHOSIS

Table 5. Recovery Parameters (Spontaneous or after Neostigmine Administration) in Cirrhotic and Control Patients

|                  | Spontaneous Recovery |                        |                        | Reversed Recovery     |                |                        |                        |
|------------------|----------------------|------------------------|------------------------|-----------------------|----------------|------------------------|------------------------|
|                  | Recovery Index (min) | T1/T0 = 90% Time (min) | T4/T1 = 70% Time (min) | 5 min after Injection |                | T1/T0 = 90% Time (min) | T4/T1 = 70% Time (min) |
|                  |                      |                        |                        | T1/T0 (%)             | T4/T1 (%)      |                        |                        |
| Cirrhotics       | 19.1 ± 14.6*         | 26.9 ± 19.3            | 32.8 ± 14.0            | 86.5 ± 14.2           | 55.2 ± 22.8    | 6.0 ± 3.6              | 7.5 ± 3.4              |
| [range] (median) | [5-50] (12.5)        | [6-62] (22)            | [17-60] (27)           | [60-99] (91)          | [0-87] (58.5)  | [3-16] (5)             | [3-16] (7)             |
| Controls         | 9.5 ± 3.0            | 13.4 ± 4.2             | 23.2 ± 10.8            | 93.7 ± 10.4           | 66.0 ± 17.9    | 3.6 ± 2.5              | 5.3 ± 2.2              |
| [range] (median) | [3-14] (10)          | [4-18] (13.5)          | [7-41] (22)            | [84-99] (99)          | [33-95] (66.5) | [1-10] (3)             | [2.5-10] (5.3)         |
| P                | <0.05                | NS                     | NS                     | NS                    | NS             | NS                     | NS                     |

NS = not significant.

onset time was shortened in both groups by increasing the dose.<sup>§</sup>

The ED<sub>50</sub> obtained from the dose-response curve in healthy patients seems less than what usually is calculated for this agent.<sup>17-19</sup> Oris *et al.*<sup>20</sup> obtained ED<sub>50</sub> values very close to the current results in patients receiving rocuronium under isoflurane anesthesia. The potentiation of rocuronium action by isoflurane might explain our low ED<sub>50</sub> value. The large interindividual variability observed in both groups for the lowest doses confirms the results already published by Mellinghoff *et al.*<sup>||</sup>

The statistically significantly different dose-response curve in cirrhotic patients associated with an important reduction in the magnitude of block for the lower initial dose and leading to a more than two-fold increase in the ED<sub>50</sub> in those patients can be related to the larger initial volume of distribution. This mechanism has been proposed to explain the so-called "resistance" to pancuronium action in cirrhotic patients.<sup>4,21</sup> Khalil *et al.*<sup>22</sup> observed a longer onset of rocuronium action in cirrhotic patients when compared to control subjects after a single dose of 600 µg · kg<sup>-1</sup>. The pharmacokinetic study performed with the same patients<sup>22</sup> failed to show a statistically significant difference in the initial volume of distribution between cirrhotic patients and control subjects, despite a trend toward a larger initial volume

of distribution in cirrhotic patients. This might be because of the small number of blood samples in the early phase of rocuronium concentration decay, which might reduce the precision of the analysis of the initial distribution of rocuronium. Similarly, in another study describing the pharmacokinetics of rocuronium after a single bolus injection to patients with liver disease, Magorian *et al.* demonstrated a significant increase in the initial volume of distribution.<sup>23</sup>

Our data show that cirrhosis induces a prolongation of rocuronium action (longer duration of the initial dose, trend toward prolongation of action of maintenance doses), but that this alteration remains moderate (the difference in duration of action of the first maintenance dose did not reach statistical significance), and specifically, that interindividual variability in cirrhotic patients is important (fig. 3 compared to fig. 4). This important interindividual variability among the cirrhotic population is mainly due to the difficulty to define homogeneous groups of patients in liver disease when no clinical or biologic parameter allows so far a precise estimation of the metabolic capacities of the liver. Of the seven cirrhotic patients who had a markedly prolonged duration of action of the initial dose, only three had intraabdominal surgery that might impair liver blood flow, and four were Pugh class A patients, with a mild disease. Those seven patients were not the oldest ones (age might alter rocuronium pharmacodynamics<sup>24,25</sup>), and for six of them, plasma bilirubin concentrations were not the highest even if biliary elimination contributes to rocuronium elimination,<sup>2</sup> as it does to vecuronium elimination.<sup>26-29</sup> The prolongation of rocuronium action in cirrhotic patients is also responsible for the slower spontaneous recovery

§ Mayer M, Doenicke A, Angster R, Hoffman A, Peter K: ORG9426: The increase of dose shortens the onset time (abstract). ANESTHESIOLOGY 1991; 75:A1070.

|| Mellinghoff H, Diefenbach C, Buzello W: Neuromuscular and cardiovascular properties of ORG9426 (abstract). ANESTHESIOLOGY 1991; 75:A807.



Table 6. Pharmacokinetic Parameters Calculated from the Models in Cirrhotic and Control Patients

|               | $T_{1/2\alpha}$ (min) | $T_{1/2\beta}$ (min) | V (ml/kg)   | $Cl_E$ (ml · min <sup>-1</sup> ) | $V_{ss}$ (ml · kg <sup>-1</sup> ) | MRT (min) | k <sub>10</sub> (min <sup>-1</sup> ) |
|---------------|-----------------------|----------------------|-------------|----------------------------------|-----------------------------------|-----------|--------------------------------------|
| Cirrhotics    |                       |                      |             |                                  |                                   |           |                                      |
| 19            | 1.9                   | 62                   | 38          | 170                              | 267                               | 66        | 0.1060                               |
| 21            | 3.2                   | 84                   | 74          | 282                              | 438                               | 87        | 0.0678                               |
| 22            | 9.5                   | 95                   | 70          | 158                              | 206                               | 85        | 0.0352                               |
| 23            | 6.5                   | 79                   | 70          | 214                              | 214                               | 85        | 0.0360                               |
| 24            | 12.3                  | 159                  | 84          | 104                              | 270                               | 168       | 0.0197                               |
| 26            | 26                    | 110                  | 135         | 206                              | 188                               | 60        | 0.0231                               |
| Median values | 8                     | 90                   | 72          | 188                              | 241                               | 85        |                                      |
| Mean ± SD     | 9.9 ± 8.8             | 98 ± 34              | 78.5 ± 31.7 | 189 ± 60                         | 264 ± 92                          | 92 ± 39   |                                      |
| Controls      |                       |                      |             |                                  |                                   |           |                                      |
| 17            | 1.8                   | 76                   | 12          | 186                              | 130                               | 61        | 0.1796                               |
| 19            | 4.2                   | 93                   | 59          | 474                              | 237                               | 30        | 0.1356                               |
| 20            | 1.0                   | 69                   | 19          | 144                              | 100                               | 56        | 0.3046                               |
| 21            | 2.5                   | 34                   | 33          | 198                              | 120                               | 33        | 0.1098                               |
| 22            | 1.2                   | 27                   | 18          | 227                              | 109                               | 25        | 0.2528                               |
| 23            | 1.6                   | 34                   | 38          | 545                              | 215                               | 26        | 0.2207                               |
| Median values | 1.7                   | 52                   | 26          | 213                              | 125                               | 32        |                                      |
| Mean ± SD     | 2.1 ± 0.5             | 56 ± 27              | 29.8 ± 17.3 | 296 ± 169                        | 151 ± 59                          | 39 ± 16   |                                      |
| P             | <0.02                 | <0.05                | <0.01       | NS                               | =0.05                             | <0.01     | <0.01                                |

in cirrhotic patients, already statistically significant after a single dose.<sup>22</sup>

The alterations in the clinical course of muscle relaxation in cirrhotic patients are related mainly to changes in pharmacokinetics of muscle relaxants.<sup>4,5,21,26,28,30,31</sup> The absence of difference in rocuronium plasma concentrations in this study between cirrhotic patients and control subjects at the time of 25% recovery of the twitch height corroborates this hypothesis. The low rocuronium plasma concentrations observed at 25% recovery of the twitch height when compared

to the data obtained during total intravenous anesthesia or halothane anesthesia<sup>1,20</sup> are likely due to the potentiation of rocuronium action by isoflurane. Muscle relaxants are hydrophilic drugs, and their volumes of distribution are highly dependent on extracellular fluid volume, which is frequently enhanced in cirrhotic patients even in the absence of ascitic decompensation of the disease.<sup>4,21</sup> Rocuronium is no exception to this rule.<sup>22,23</sup> This enhancement of both initial and steady-state volumes of distribution cannot be related to the hypoalbuminemia commonly observed in cirrhotic pa-

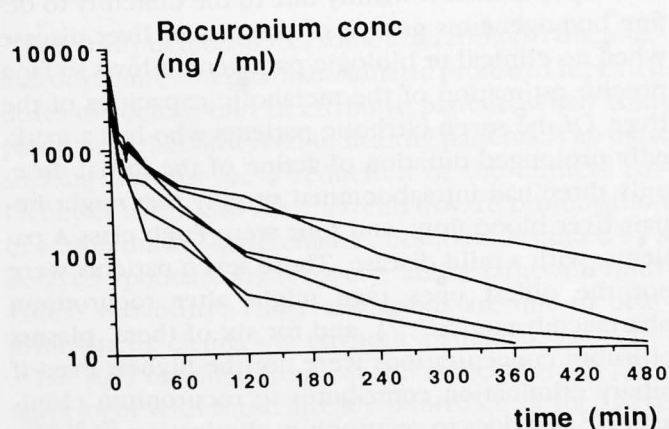

Fig. 5. Plasma concentration versus time decay curves after administration of the last maintenance dose in control subjects.

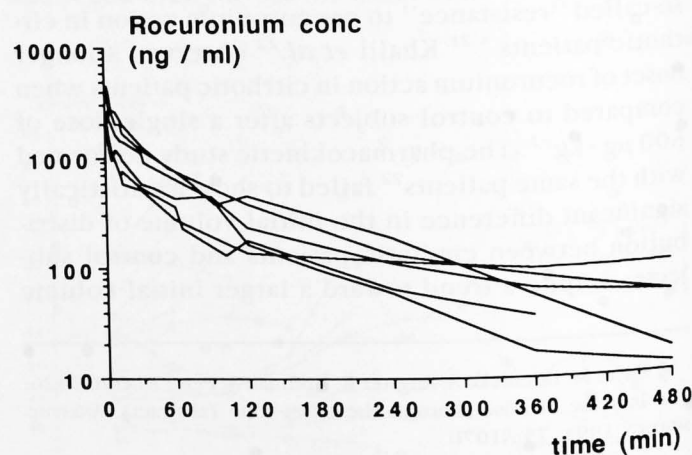

Fig. 6. Plasma concentration versus time decay curves after administration of the last maintenance dose in cirrhotic patients.

tients because rocuronium (about 25% bound to plasma proteins) was not significantly different in cirrhotic patients, but this might be of patients who underwent rocuronium anesthesia. Nevertheless, more pharmacokinetic studies in cirrhotic patients are needed to clarify the role of clearance modification in the association of distribution and elimination impairment in cirrhotic patients, such as reduced hepatic blood flow and a prolongation of the elimination half-life. In this context, interindividual variability in rocuronium pharmacokinetics in cirrhotic patients to monitor rocuronium dosage to avoid toxic effects in rocuronium anesthesia is responsible for the poor results in cirrhotic patients.

Cirrhosis induces changes in pharmacodynamics and pharmacokinetics of rocuronium. The data obtained with rocuronium in cirrhotic patients show a rocuronium structure. The variability in the clinical course of rocuronium for a careful titration of rocuronium by monitoring neuromuscular activity of rocuronium action in cirrhotic patients.

## References

1. Wierda JM, Kleef J, S: The pharmacodynamics of rocuronium, a non-depolarizing neuromuscular blocker, in patients anesthetized with nitrous oxide. *Anaesthesia* 1991; 38:430-5
2. Khinl-Brady KS, C, S, Miller RD: The neuropharmacology of rocuronium: pharmacokinetics of ORG9426 and its metabolites. *Anaesthesia* 1991; 38:669-74
3. Sandker GW, Wee DKF, Groothuis GMM: CYP2C9 and CYP2C19 in human liver: A study with charged ouabain and theophylline. *Biochem Pharmacol* 1991; 51:1131-40
4. Duvaldestin P, Agnani P, et al: Pharmacokinetics of rocuronium in patients with liver disease. *Anaesthesia* 1978; 50:1131-40

# Wierda JMKH, Proc for rapid onset. *Anaesthesia* 1991; 38:430-5

## CLINICAL AND PHARMACOKINETIC STUDY OF ROCURONIUM IN CIRRHOSIS

| MRT (min) | k <sub>10</sub> (min <sup>-1</sup> ) |
|-----------|--------------------------------------|
| 66        | 0.1060                               |
| 87        | 0.0678                               |
| 85        | 0.0352                               |
| 85        | 0.0360                               |
| 168       | 0.0197                               |
| 60        | 0.0231                               |
| 85        |                                      |
| 92 ± 39   |                                      |
| 61        | 0.1796                               |
| 30        | 0.1356                               |
| 56        | 0.3046                               |
| 33        | 0.1098                               |
| 25        | 0.2528                               |
| 26        | 0.2207                               |
| 32        |                                      |
| 39 ± 16   |                                      |
| <0.01     | <0.01                                |

tients because rocuronium is not very protein-bound (about 25% bound to albumin).# Rocuronium clearance was not significantly altered in our cirrhotic patients, but this might be because of the small number of patients who underwent pharmacokinetic analysis. Nevertheless, more precise data on the role of the liver in rocuronium elimination are warranted to interpret clearance modifications in cirrhotic patients. The association of distribution disturbances and possibly mild elimination impairment led to alterations in time constants, such as a reduction in elimination constant  $k_{10}$  and a prolongation of mean resident time, which infer a delayed elimination of rocuronium in cirrhotic patients. In this context and considering the important interindividual variability, it is mandatory in cirrhotic patients to monitor rocuronium action and titrate rocuronium dosage to the patient's needs. The modifications in rocuronium pharmacokinetics are likely responsible for the prolonged recovery index in cirrhotic patients.

Cirrhosis induces moderate changes in rocuronium pharmacodynamics. Those changes, most likely due to pharmacokinetic alterations, are consistent with the data obtained with other muscle relaxants having a steroid structure. The importance of the interindividual variability in the cirrhotic patients suggests the need for a careful titration of the dosage to the patient's needs by monitoring neuromuscular transmission. Reversal of rocuronium action appears useful, specifically in cirrhotic patients.

## References

1. Wierda JM, Kleef UW, Lambalk LM, Kloppenburg WD, Agoston S: The pharmacodynamics and pharmacokinetics of Org 9426, a new non-depolarizing neuromuscular blocking agent, in patients anaesthetized with nitrous oxide, halothane and fentanyl. *Can J Anaesth* 1991; 38:430-5
2. Khünl-Brady KS, Castagnoli KP, Canfell PC, Caldwell JE, Agoston S, Miller RD: The neuromuscular blocking effects and pharmacokinetics of ORG9426 and ORG9616 in the cat. *ANESTHESIOLOGY* 1990; 72:669-74
3. Sandker GW, Weert B, Olinga P, Wolters H, Sloof MJH, Meijer DKF, Groothuis GMM: Characterization of transport in isolated human hepatocytes: A study with the bile acid taurocholic acid, the uncharged ouabain and the organic cations vecuronium and rocuronium. *Biochem Pharmacol* 1994; 47:2193-200
4. Duvaldestin P, Agoston S, Henzel D, Kersten UW, Desmonts JM: Pancuronium pharmacokinetics in patients with liver cirrhosis. *Br J Anaesth* 1978; 50:1131-6
5. Lebrault C, Berger JL, D'Hollander AA, Gemeni R, Henzel D: Pharmacokinetics and pharmacodynamics of vecuronium (ORG NC45) in patients with cirrhosis. *ANESTHESIOLOGY* 1985; 62:601-5
6. Kleef UW, Proost JH, Roggevel J, Wierda JMK: Determination of rocuronium and its putative metabolites in body fluids and tissue homogenates. *J Chromatogr* 1993; 621:65-76
7. Gomeni R: PHARM—an interactive graphic program for individual and population pharmacokinetic parameter estimation. *Comput Biol Med* 1984; 14:25-34
8. Berman M, Shahn E, Weiss MF: The routine fitting of kinetic data to models: A mathematical formalism for digital computers. *Biophys J* 1962; 2:275-87
9. Rowland M, Tozer TN: Distribution kinetics, Clinical Pharmacokinetics, Concepts and Applications. 2nd edition. Philadelphia, Lea & Febiger, 1989, pp 297-322
10. Pugh RNH, Murray-Lyon IM, Dawson JL, Pietroni MC, Williams R: Transsection of the oesophagus for bleeding oesophageal varices. *Br J Surg* 1973; 60:646-9
11. Stanski DR, Ham J, Miller RD, Sheiner LB: Time dependent increase in sensitivity to d-tubocurarine during enflurane anesthesia in man. *ANESTHESIOLOGY* 1980; 52:483-7
12. Carpenter RL, Eger EI II, Johnson BH, Unadkat JD, Sheiner LB: Pharmacokinetics of inhaled anesthetics in humans: Measurements during and after the simultaneous administration of enflurane, isoflurane, methoxyflurane and nitrous oxide. *Anesth Analg* 1986; 65:575-82
13. Agoston S: Interactions of volatile anaesthetics with rocuronium bromide in perspective. *Eur J Anaesthesiol Suppl* 1994; 9:107-11
14. Wright PMC, Hart P, Lau M, Brown R, Sharma ML, Gruenke L, Fisher DM: The magnitude and time course of vecuronium potentiation by desflurane *versus* isoflurane. *ANESTHESIOLOGY* 1995; 82:404-11
15. Cannon JE, Fahey MR, Castagnoli KP, Furuta T, Canfell PC, Sharma M, Miller RD: Continuous infusion of vecuronium: The effect of anesthetic agents. *ANESTHESIOLOGY* 1987; 67:503-6
16. Donati F: Onset of action of relaxants. *Can J Anaesth* 1988; 35:S52-8
17. Cooper RA, Mirakhur RK, Elliott P, McCarthy GJ: Estimation of the potency of ORG 9426 using two different modes of nerve stimulation. *Can J Anaesth* 1992; 39:139-42
18. Foldes FF, Nagashima H, Nguyen HD, Schiller WS, Mason MM, Ohta Y: The neuromuscular effects of ORG9426 in patients receiving balanced anesthesia. *ANESTHESIOLOGY* 1991; 75:191-6
19. Lambalk LM, de Wit APM, Wierda JMKH, Hennis PJ, Agoston S: Dose-response relationship and time course of action of ORG 9426. *Anaesthesia* 1991; 46:907-11
20. Oris B, Crul JF, Vandermeersch E, Van Aken H, Van Egmond J, Sabbe MB: Muscle paralysis by rocuronium during halothane, enflurane, isoflurane, and total intravenous anesthesia. *Anesth Analg* 1993; 77:570-3
21. Agoston S, Vandenbrom RHG, Wierda JMKH: Clinical pharmacokinetics of neuromuscular blocking drugs. *Clin Pharmacokinet* 1992; 22:94-115
22. Khalil M, D'Honneur G, Duvaldestin P, Slavov V, De Hys C, Gomeni R: Pharmacokinetics and pharmacodynamics of rocuronium in patients with cirrhosis. *ANESTHESIOLOGY* 1994; 80:1241-7
23. Magorian T, Wood P, Caldwell J, Fisher D, Segredo V, Sze-nohradzky J, Sharma M, Gruenke L, Miller R: The pharmacokinetics

# Wierda JMKH, Proost JH, Muir AW, Marshall RJ: Design of drugs for rapid onset. *Anaesth Pharmacol Rev* 1993; 1:57-68.



and neuromuscular effects of rocuronium bromide in patients with liver disease. *Anesth Analg* 1995; 80:754-9

24. Bevan DR, Fiset P, Balendran P, Law-Min JC, Ratcliffe A, Donati F: Pharmacodynamic behavior of rocuronium in the elderly. *Can J Anaesth* 1993; 40:127-32

25. Matteo RS, Ornstein E, Schwartz AE, Ostapkovich N, Stone JG: Pharmacokinetics and pharmacodynamics of rocuronium (Org 9426) in elderly surgical patients. *Anesth Analg* 1993; 77:1193-7

26. Bencini AF, Scaf AHJ, Sohn YJ, Kersten-Kleef UW, Agoston S: Hepatobiliary disposition of vecuronium bromide in man. *Br J Anaesth* 1986; 58:988-95

27. Lebrault C, Duvaldestin P, Henzel D, Chauvin M, Guesnon P: Pharmacokinetics and pharmacodynamics of vecuronium in patients with cholestasis. *Br J Anaesth* 1986; 58:983-7

28. Westra P, Keulemans GTP, Houwertjes MC, Hardonk MJ, Meijer DKF: Mechanisms underlying the prolonged duration of action of muscle relaxants caused by extrahepatic cholestasis. *Br J Anaesth* 1981; 53:217-27

29. Westra P, Houwertjes MC, Wesseling H, Meijer DKF: Bile salts and neuromuscular blocking agents. *Br J Anaesth* 1981; 53:407-15

30. Bell CF, Hunter JM, Jones RS, Utting JE: Use of atracurium and vecuronium in patients with oesophageal varices. *Br J Anaesth* 1985; 57:160-8

31. Westra P, Vermeer GA, de Lange AR, Scaf AHJ, Meijer DKF: Hepatic and renal disposition of pancuronium and gallamine in patients with extrahepatic cholestasis. *Br J Anaesth* 1981; 53:331-8

## Fiberoptic Paralysis

### Results of a

A. F. D. Cole, M.D.,  
C. Ananthanarayanan,

**Background:** The teaching of fiberoptic intubation is a necessity for the success of a training program. Students routinely were anesthetized, paralyzed, and intubated.

**Methods:** Eight intubations were performed using fiberoptic and conventional techniques simultaneously during the same procedure. Of these intubations, five were performed using fiberoptic intubation and three were performed using conventional intubation. The two techniques were compared in a randomized trial in which the time to intubation, SpO<sub>2</sub>, and complications were recorded.

**Results:** There was no difference in the time to intubation between the two groups. Mean SpO<sub>2</sub> was 95% for fiberoptic and 94% for conventional intubation (P < 0.001).

**Conclusions:** No difference in the time to intubation or in the volume of ex-

\* Assistant Professor

Received from the Department of Anesthesiology and University of Toronto, and published in the *Journal of Clinical Anesthesia*, July 1996. Presented in part at the Annual Meeting of the Society of Anesthesiologists, October 1995.

Address reprint requests to Dr. Cole at Mt. Sinai Hospital, 2800 Avenue Road, Toronto, Ontario, Canada M5T 1A5.

† Davis KR: Use of fiberoptic intubation in the operating room. *Anesthesiology* 1992; 77:A1069.

Anesthesiology, V 84, No 5, May 1996
